# Supplementary material
Source: HighWire-hosted journal article supplement (https://ard.bmj.com/highwire/filestream/202605/field_highwire_adjunct_files/0/ARD_table_146068.pdf)
Supplement: ARD_table_146068.pdf [file ARD_table_146068.pdf]

## SUPPLEMENTARY TABLE

**Table 1: Magnetic resonance imaging protocols for large and small wrist coils.**

| Sequence                                                               | TR (ms) | TE (ms) | TI (ms) | Slice thickness (mm) | Gap (mm) | FOV (cm) |
|------------------------------------------------------------------------|---------|---------|---------|----------------------|----------|----------|
| <b>Large wrist coil<sup>1</sup></b>                                    |         |         |         |                      |          |          |
| MCP & Wrist<br>T1 FSE<br>Axial, Precontrast                            | 420     | 13      | n/a     | 3                    | 1        | 16       |
| MCP & Wrist<br>T1 FSE<br>Coronal, Precontrast                          | 420     | 13      | n/a     | 2<br>(interleaved)   | 0        | 16       |
| MCP & Wrist<br>STIR<br>Coronal, Precontrast <sup>2</sup>               | 3760    | 45      | 150     | 3                    | 1        | 16       |
| MCP & Wrist<br>T1 Fat-suppressed<br>Coronal, Postcontrast <sup>3</sup> | 420     | 13      | n/a     | 4                    | 1        | 16       |
| <b>Small wrist coil<sup>1</sup></b>                                    |         |         |         |                      |          |          |
| MCP<br>T1 FSE<br>Axial, Precontrast                                    | 420     | 13      | n/a     | 3                    | 1        | 10-12    |
| MCP<br>T1 FSE<br>Coronal, Precontrast                                  | 420     | 13      | n/a     | 2<br>(Interleaved)   | 0        | 10-12    |
| MCP<br>STIR<br>Coronal, Precontrast <sup>2</sup>                       | 3760    | 45      | 150     | 3                    | 1        | 10-12    |
| Wrist<br>T1 FSE<br>Axial, Precontrast                                  | 420     | 13      | n/a     | 3                    | 1        | 10-12    |
| Wrist<br>T1 FSE<br>Coronal, Precontrast                                | 420     | 13      | n/a     | 2<br>(interleaved)   | 0        | 10-12    |
| Wrist<br>STIR<br>Coronal, Precontrast <sup>2</sup>                     | 3760    | 45      | 150     | 3                    | 1        | 10-12    |
| Wrist<br>T1 Fat-suppressed,<br>Coronal, Postcontrast <sup>3</sup>      | 420     | 13      | n/a     | 4                    | 1        | 10-12    |

<sup>1</sup> Depending on availability in the individual centers a large or a small wrist coil was used. If a large wrist coil was used, the coil was positioned to include the MCP joints and wrist in FOV. If a small wrist coil was used, the MCP joints were imaged, all precontrast, and then the coil was positioned for the wrist joint and the pre- and postcontrast series were imaged.

<sup>2</sup> A coronal STIR or T2-weighted fat-suppressed sequence (choice by center) was obtained with the shown slice thickness/FOV. The parameters for the STIR sequence are shown.

<sup>3</sup> Gadolinium-contrast agent, 0.1 mmol (0.2 cc)/kg (20 cc maximum), administered intravenously through prepositioned access via rapid hand injection followed by a 20-mL saline flush. Image was to be acquired as soon as possible after completing the saline flush.

*FOV=field of view, FSE=fast spin echo, MCP=metacarpophalangeal, STIR= Short Tau Inversion Recovery, TE=echo time, TI=inversion time, TR=repetition time*
